# Supplementary material
Source: PubMed Central journal article supplement (PMC4980282)
Supplement: NIHMS767624-supplement-supplement_1.pdf [file NIHMS767624-supplement-supplement_1.pdf]

481 **SUPPLEMENTARY FIGURE LEGENDS**

482 **Figure 1. Boxplot (median and IQR) of cumulative dose of prednisolone predicting**  
483 **the final BMD Z-score in the CAMP population**

484 *P* values were obtained from regression analysis adjusted by age, sex, height, BMD Z-  
485 score, height, Tanner stage, and vitamin D level measured at baseline. Data represent  
486 median (IQR).

487

488 **Figure 2. Regional association plot for the rs6461639 locus**

489 **Table 1. The top 100-ranked SNPs identified in the primary GWAS in CAMP**

| Rank | SNP        | Chromosome | Base position | Beta       | P value  |
|------|------------|------------|---------------|------------|----------|
| 1    | rs6996193  | 8          | 13294470      | -0.0008058 | 8.46E-08 |
| 2    | rs7143860  | 14         | 81740149      | -0.0009202 | 1.36E-07 |
| 3    | rs1952760  | 14         | 81736655      | -0.0009203 | 1.40E-07 |
| 4    | rs4770248  | 13         | 21692240      | -0.0003255 | 3.25E-07 |
| 5    | rs11875246 | 18         | 65640955      | -0.0004315 | 3.46E-07 |
| 6    | rs1430580  | 4          | 141790122     | -0.0003415 | 6.90E-07 |
| 7    | rs12374178 | 3          | 54290074      | -0.0005128 | 8.03E-07 |
| 8    | rs7632782  | 3          | 143795088     | -0.000595  | 1.38E-06 |
| 9    | rs11090468 | 22         | 25759111      | -0.0004822 | 2.18E-06 |
| 10   | rs209510   | 6          | 53309994      | 0.0002849  | 2.27E-06 |
| 11   | rs9899990  | 17         | 9062304       | -0.0004945 | 2.48E-06 |
| 12   | rs10926189 | 1          | 233827440     | -0.0002967 | 4.39E-06 |
| 13   | rs1368284  | 5          | 146608620     | -0.0003785 | 5.10E-06 |
| 14   | rs12896581 | 14         | 44179903      | -0.0007434 | 5.20E-06 |
| 15   | rs1127792  | 5          | 15707479      | -0.0004273 | 5.39E-06 |
| 16   | rs7793087  | 7          | 47468816      | 0.0002716  | 5.49E-06 |
| 17   | rs715627   | 22         | 26514328      | -0.0005784 | 5.64E-06 |
| 18   | rs1407515  | 6          | 168869448     | -0.0004138 | 6.49E-06 |
| 19   | rs10135954 | 14         | 81772833      | -0.0004357 | 6.50E-06 |
| 20   | rs1958905  | 14         | 39986993      | -0.0003482 | 7.21E-06 |
| 21   | rs11845822 | 14         | 39988607      | -0.0003482 | 7.21E-06 |
| 22   | rs7427716  | 3          | 54314616      | -0.0005132 | 7.93E-06 |
| 23   | rs10166049 | 2          | 53624174      | -0.0006192 | 8.63E-06 |
| 24   | rs1429146  | 6          | 53238244      | 0.000269   | 8.82E-06 |
| 25   | rs11122574 | 1          | 228904431     | -0.0006874 | 8.88E-06 |
| 26   | rs9346911  | 6          | 162677104     | -0.0003461 | 9.22E-06 |
| 27   | rs17648647 | 16         | 77669698      | -0.0002908 | 9.59E-06 |
| 28   | rs6138201  | 20         | 24022349      | 0.000276   | 9.84E-06 |
| 29   | rs7732739  | 5          | 71445139      | 0.0003219  | 1.08E-05 |
| 30   | rs16909393 | 11         | 11279642      | -0.0003679 | 1.10E-05 |
| 31   | rs12341040 | 9          | 81180133      | -0.0006467 | 1.17E-05 |
| 32   | rs1318703  | 16         | 7093693       | 0.0002982  | 1.20E-05 |
| 33   | rs4718560  | 7          | 66516217      | -0.0005157 | 1.26E-05 |
| 34   | rs12480224 | 20         | 24058966      | 0.0002743  | 1.27E-05 |
| 35   | rs2977187  | 8          | 1667184       | -0.0004688 | 1.28E-05 |

Genetic risk factor for the decreased BMD in children after steroid treatments

|           |                  |          |                 |                   |                 |
|-----------|------------------|----------|-----------------|-------------------|-----------------|
| 36        | rs11134987       | 5        | 175985548       | -0.0006355        | 1.31E-05        |
| 37        | rs6034167        | 20       | 15307027        | -0.0006878        | 1.39E-05        |
| 38        | rs9937643        | 16       | 84658374        | -0.0002729        | 1.40E-05        |
| 39        | rs3751877        | 16       | 15062399        | -0.0003614        | 1.41E-05        |
| 40        | rs4964020        | 12       | 26903270        | -0.0002779        | 1.50E-05        |
| 41        | rs10520823       | 5        | 15819072        | -0.0006243        | 1.50E-05        |
| 42        | rs1219765        | 1        | 108343432       | -0.0003743        | 1.57E-05        |
| 43        | rs848124         | 14       | 36317423        | -0.0002854        | 1.61E-05        |
| 44        | rs9395855        | 6        | 53284724        | 0.0002597         | 1.61E-05        |
| 45        | rs970427         | 18       | 17997524        | -0.0005776        | 1.61E-05        |
| 46        | rs10097139       | 8        | 82498840        | 0.0002761         | 1.65E-05        |
| 47        | rs560304         | 2        | 230530540       | -0.0002784        | 1.71E-05        |
| 48        | rs7627293        | 3        | 188116469       | -0.0007275        | 1.75E-05        |
| 49        | rs6444444        | 3        | 191828925       | -0.000349         | 1.76E-05        |
| 50        | rs2885373        | 3        | 191829162       | -0.000349         | 1.76E-05        |
| 51        | rs6966154        | 7        | 14184198        | -0.0003163        | 1.80E-05        |
| 52        | rs1464099        | 3        | 122807333       | -0.0004186        | 1.84E-05        |
| 53        | rs6915111        | 6        | 153318781       | -0.0004255        | 1.85E-05        |
| 54        | rs13408761       | 2        | 60426486        | -0.0004313        | 1.88E-05        |
| <b>55</b> | <b>rs6461639</b> | <b>7</b> | <b>22153480</b> | <b>-0.0002397</b> | <b>1.88E-05</b> |
| 56        | rs13253300       | 8        | 13571063        | -0.0003936        | 1.91E-05        |
| 57        | rs4740564        | 9        | 14250684        | -0.0005768        | 1.91E-05        |
| 58        | rs2764962        | 14       | 36297971        | -0.000284         | 1.93E-05        |
| 59        | rs813379         | 7        | 90619923        | -0.0005231        | 2.01E-05        |
| 60        | rs726046         | 21       | 39634237        | -0.0006162        | 2.10E-05        |
| 61        | rs12444777       | 16       | 50980343        | -0.0004755        | 2.14E-05        |
| 62        | rs6716729        | 2        | 60437022        | -0.0004359        | 2.14E-05        |
| 63        | rs2152492        | 14       | 52612077        | -0.0003206        | 2.22E-05        |
| 64        | rs11698401       | 20       | 24112937        | 0.0002961         | 2.24E-05        |
| 65        | rs12563016       | 1        | 108339925       | -0.0003809        | 2.26E-05        |
| 66        | rs2094910        | 14       | 39971173        | -0.0003035        | 2.29E-05        |
| 67        | rs10843350       | 12       | 29277213        | -0.0004221        | 2.30E-05        |
| 68        | rs9321367        | 6        | 133126052       | -0.0004555        | 2.31E-05        |
| 69        | rs12926028       | 16       | 77669335        | -0.0002682        | 2.42E-05        |
| 70        | rs283438         | 5        | 153853753       | -0.0003299        | 2.48E-05        |
| 71        | rs10485420       | 6        | 11943418        | -0.0005629        | 2.56E-05        |
| 72        | rs1433212        | 4        | 124972424       | -0.0003518        | 2.57E-05        |
| 73        | rs12508568       | 4        | 63300781        | -0.0003193        | 2.58E-05        |

Genetic risk factor for the decreased BMD in children after steroid treatments

|     |            |    |           |            |          |
|-----|------------|----|-----------|------------|----------|
| 74  | rs11641385 | 16 | 50962583  | -0.000423  | 2.67E-05 |
| 75  | rs11982022 | 7  | 66525876  | -0.000487  | 2.69E-05 |
| 76  | rs7129269  | 11 | 99209253  | -0.0005272 | 2.69E-05 |
| 77  | rs1722373  | 2  | 5464449   | -0.0004046 | 2.71E-05 |
| 78  | rs694927   | 6  | 44686302  | -0.0002716 | 2.72E-05 |
| 79  | rs6068509  | 20 | 51376306  | -0.0002975 | 2.72E-05 |
| 80  | rs5762864  | 22 | 27583364  | -0.0002939 | 2.73E-05 |
| 81  | rs4774684  | 15 | 52212698  | -0.0002902 | 2.75E-05 |
| 82  | rs12591326 | 15 | 52222160  | -0.0002902 | 2.75E-05 |
| 83  | rs12902669 | 15 | 52210604  | -0.0002897 | 2.77E-05 |
| 84  | rs9506807  | 13 | 21693864  | 0.0002801  | 2.78E-05 |
| 85  | rs8075056  | 17 | 9740165   | -0.0003918 | 2.94E-05 |
| 86  | rs2505515  | 10 | 42925592  | -0.0002885 | 2.94E-05 |
| 87  | rs17705966 | 2  | 187873411 | -0.0002869 | 2.95E-05 |
| 88  | rs10812520 | 9  | 27037246  | -0.0003143 | 3.08E-05 |
| 89  | rs5765728  | 22 | 43301072  | -0.0005366 | 3.10E-05 |
| 90  | rs17654049 | 8  | 31197809  | -0.0003114 | 3.16E-05 |
| 91  | rs16992439 | 19 | 4510474   | -0.0004127 | 3.16E-05 |
| 92  | rs2341459  | 2  | 44621706  | -0.0003303 | 3.17E-05 |
| 93  | rs10863378 | 1  | 216385998 | -0.0002348 | 3.19E-05 |
| 94  | rs13383631 | 2  | 68401664  | -0.0005426 | 3.20E-05 |
| 95  | rs11167966 | 5  | 146609927 | -0.0002996 | 3.24E-05 |
| 96  | rs4705140  | 5  | 146610284 | -0.0002996 | 3.24E-05 |
| 97  | rs2053034  | 5  | 146612216 | -0.0002996 | 3.24E-05 |
| 98  | rs3770132  | 2  | 182041206 | -0.0003425 | 3.27E-05 |
| 99  | rs10484177 | 14 | 43966684  | -0.000283  | 3.29E-05 |
| 100 | rs685441   | 17 | 72286420  | -0.0003686 | 3.29E-05 |

491 **Figure 1**

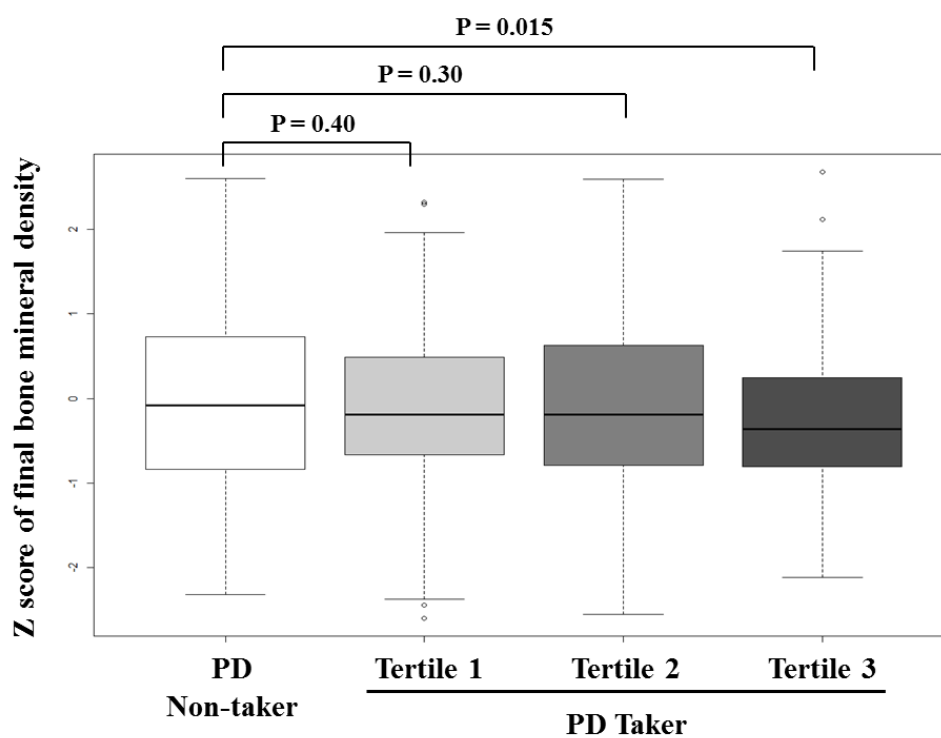

492

493

494 **Figure 2.**

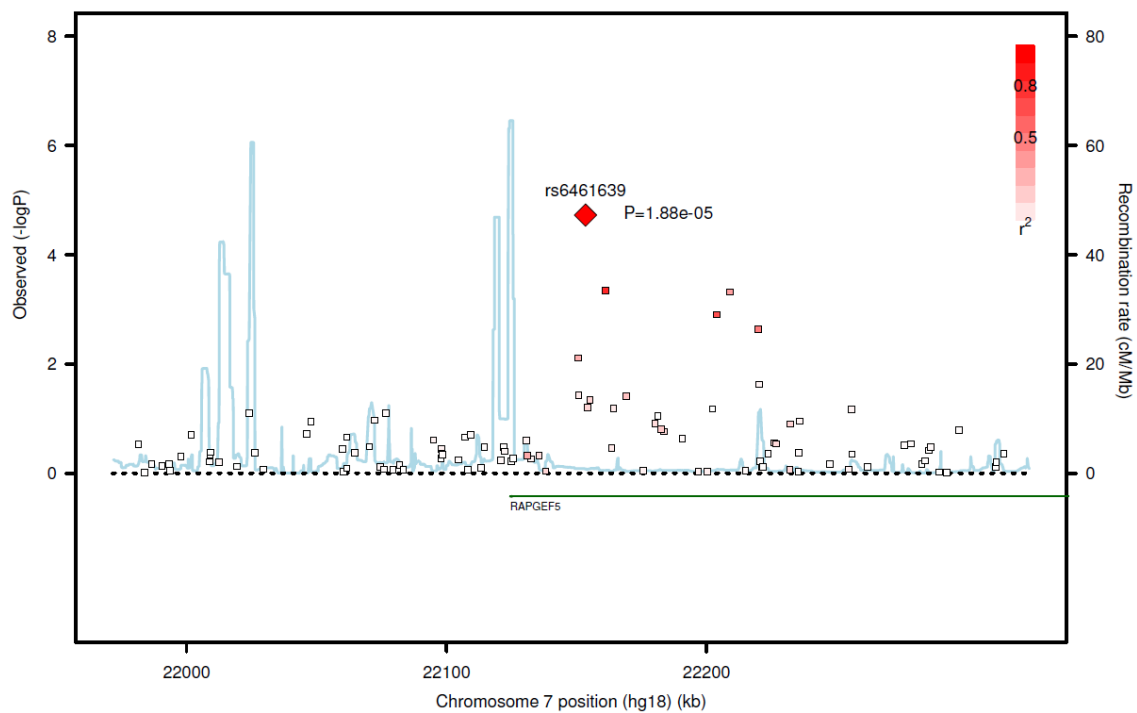

495

496

497
